# Supplementary material
Source: PubMed Central journal article supplement (PMC3346388)
Supplement: supp_78.11.3958_AEM-AEM06941-11-s01.pdf [file supp_78.11.3958_AEM-AEM06941-11-s01.pdf]

# Supplementary Fig. 1

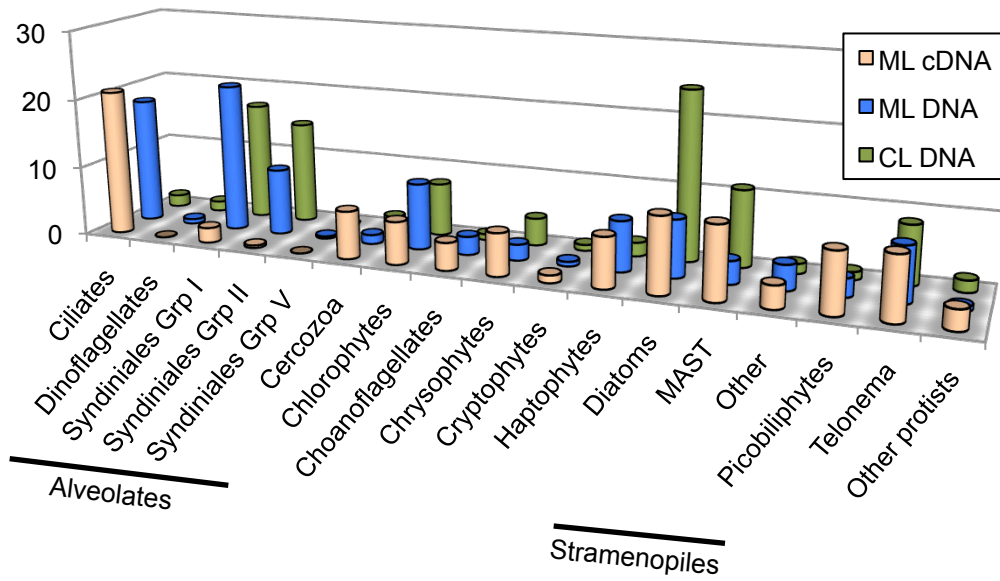

Supplementary Figure 1: Percent microbial eukaryotic taxa from 18S rRNA gene or gene transcript (cDNA) clone libraries in each of the comparative groups. ML= mechanical lysis; DNA = 18S rRNA genes; cDNA = RNA converted to cDNA.
