# Supplementary material
Source: PubMed Central journal article supplement (PMC3346388)
Supplement: supp_78.11.3958_AEM-AEM06941-11-s02.pdf [file supp_78.11.3958_AEM-AEM06941-11-s02.pdf]

Table S1. Number of OTUs and clones that belong to Syndiniales groups.

|                      | No. of OTUs | 0.8ML cDNA | 0.8MLDNA | 0.8CLDNA |
|----------------------|-------------|------------|----------|----------|
| Group I Clade 1      | 5           | 6          | 53       | 57       |
| Group I Clade 3      | 1           |            | 1        |          |
| Group I Clade 4      | 1           |            | 1        |          |
| Group I Clade 5      | 4           |            | 2        | 3        |
| Group II Clade 1     | 1           |            | 1        |          |
| Group II Clade 10+11 | 4           | 1          | 22       | 43       |
| Group II Clade 16    | 1           |            |          | 1        |
| Group II Clade 39    | 1           |            | 1        |          |
| Group II Clade 44    | 1           |            |          | 1        |
| Group II Clade 6     | 1           |            |          | 3        |
| Group II Clade 7     | 2           |            | 4        | 4        |
| Group II Clade 8     | 1           |            | 1        |          |
| Group V              | 1           |            | 1        |          |
