# Supplementary material
Source: PubMed Central journal article supplement (PMC3346388)
Supplement: supp_78.11.3958_AEM-AEM06941-11-s03.pdf [file supp_78.11.3958_AEM-AEM06941-11-s03.pdf]

Table S2. Number of OTUs and clones that belong to marine stramenopile (MAST) groups.

|         | No. of OTUs | 0.8ML_cDNA | 0.8ML_DNA | 0.8CL_DNA |
|---------|-------------|------------|-----------|-----------|
| MAST-1  | 2           | 10         | 3         | 14        |
| MAST-12 | 1           |            |           | 1         |
| MAST-3  | 1           | 3          |           |           |
| MAST-4  | 1           | 5          | 5         | 6         |
| MAST-7  | 1           | 8          | 2         | 8         |
| MAST-8  | 1           | 1          |           | 1         |
